# Supplementary material
Source: PubMed Central journal article supplement (PMC6127172)
Supplement: rsif20180166supp1.pdf [file rsif20180166supp1.pdf]

Dynamic modeling of personal protection control strategies  
for vector-borne disease limits the role of diversity  
amplification: Supplementary material

Jeffery Demers<sup>1 2</sup>, Sharon Bewick<sup>1</sup>, Justin Calabrese<sup>1 2</sup>, and William F. Fagan<sup>1</sup>

<sup>1</sup>Department of Biology, University of Maryland College Park, College Park, MD  
20742, United States

<sup>2</sup>Conservation Ecology Center, Smithsonian Conservation Biology Institute,  
National Zoological Park, 1500 Remount Rd., Front Royal, VA 22630, United  
States

## S1 Effects of varied human recovery time

The following plots are the equivalent of Figs. 1 - 4 in the main text for a human recovery times  $1/r = 1$  week and  $1/r = 6$  months. The dynamic two-class model behaves more similarly to the static two-class model for shorter recovery times, and more similarly the one-class model for longer recovery times.

### S1.1 One week recovery time

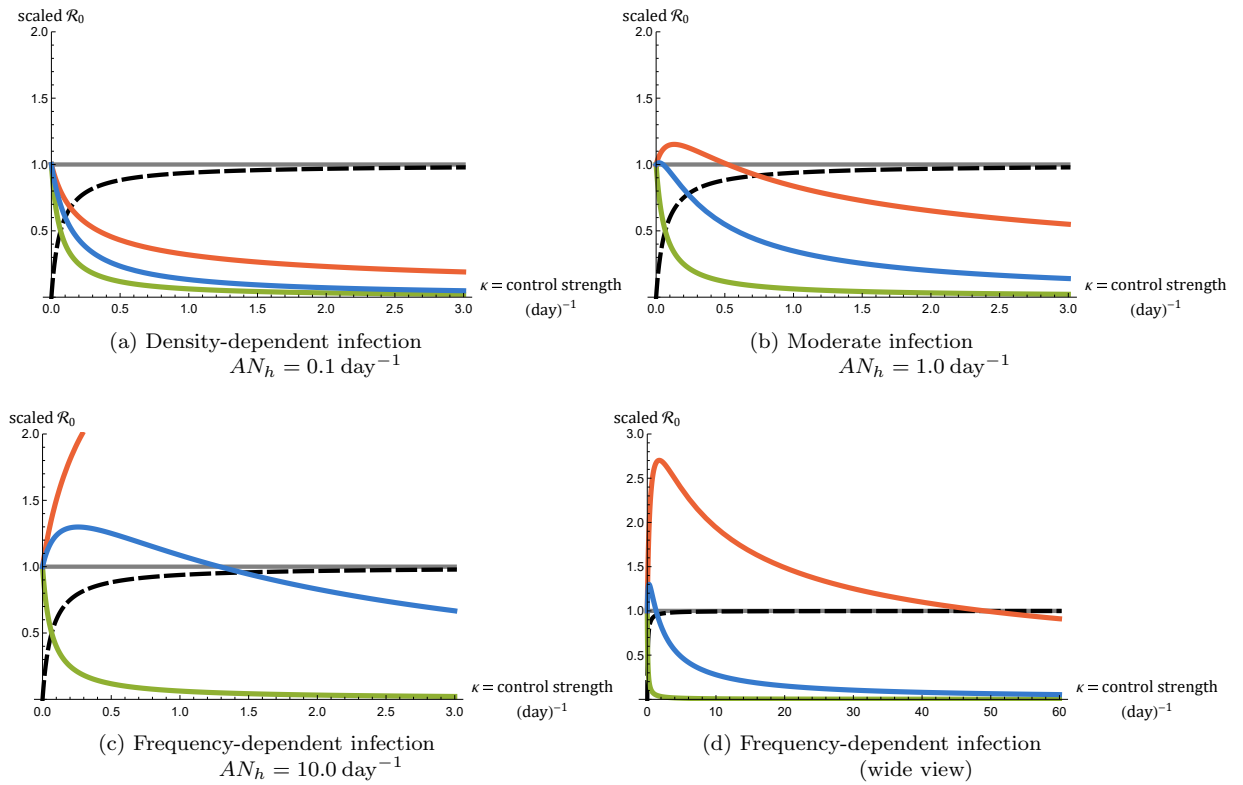

Figure S1: Dependencies of  $\mathcal{R}_0$  on DEET ( $1/\gamma = 15$  days) control strength for the dynamic two-class model (blue), static two-class model (red), and one-class model (green), where the human recovery time  $1/r = 1$  week. Corresponding equilibrium proportions of protected hosts are given by the dashed black curve. Two-host models display diversity amplification at control strengths where respective scaled  $\mathcal{R}_0$  curves rise above the gray  $\mathcal{R}_0 = 1$  line.

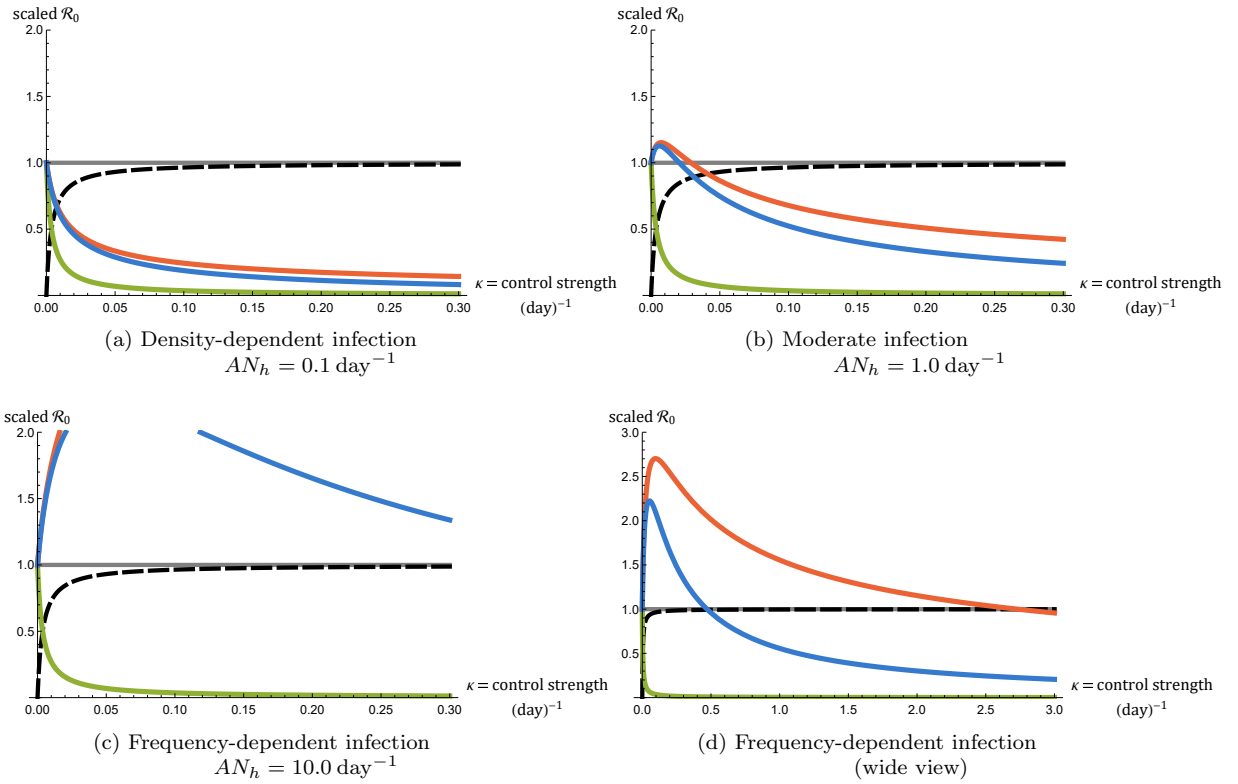

Figure S2: Dependencies of  $\mathcal{R}_0$  on intermediate protection ( $1/\gamma = 9$  months) control strength, where the human recovery time  $1/r = 1$  week. Curve colors and styles are defined as in Fig. S1.

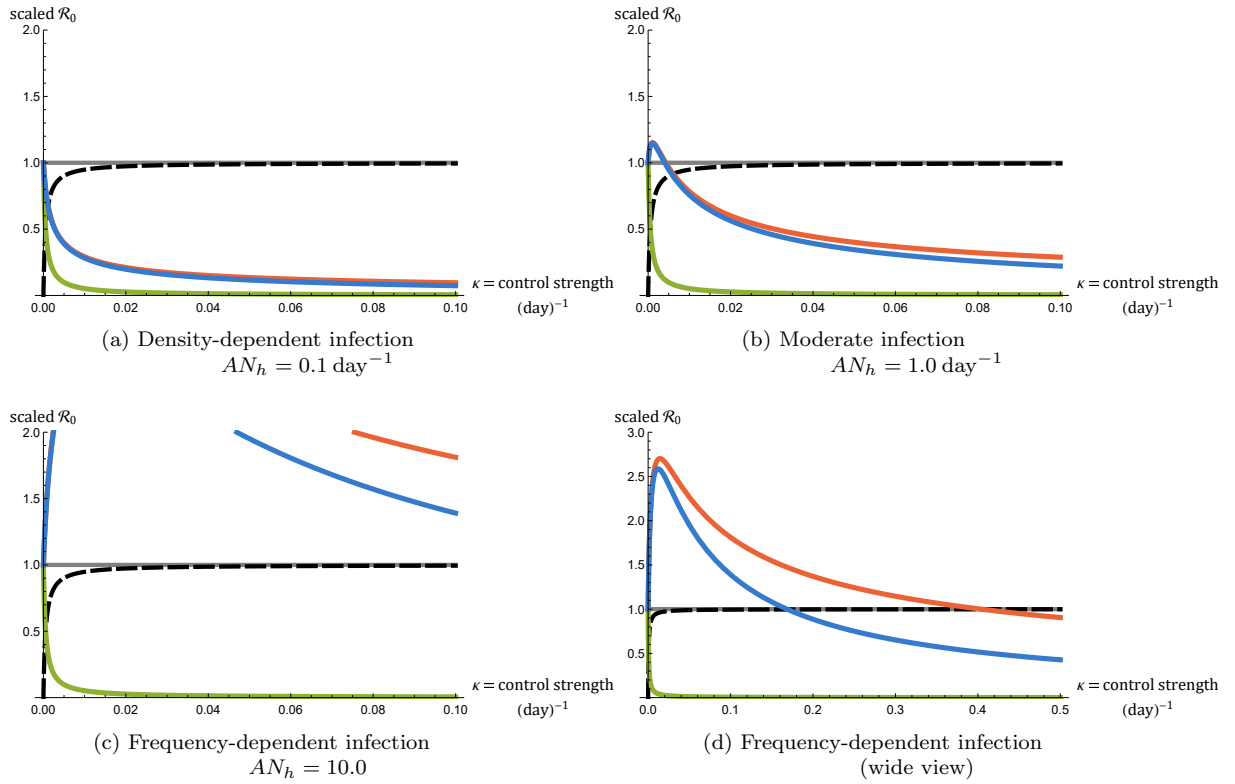

Figure S3: Dependencies of  $\mathcal{R}_0$  on bed net ( $1/\gamma = 5$  years) control strength, where the human recovery time  $1/r = 1$  week. Curve colors and styles are interpreted as in Fig. S1.

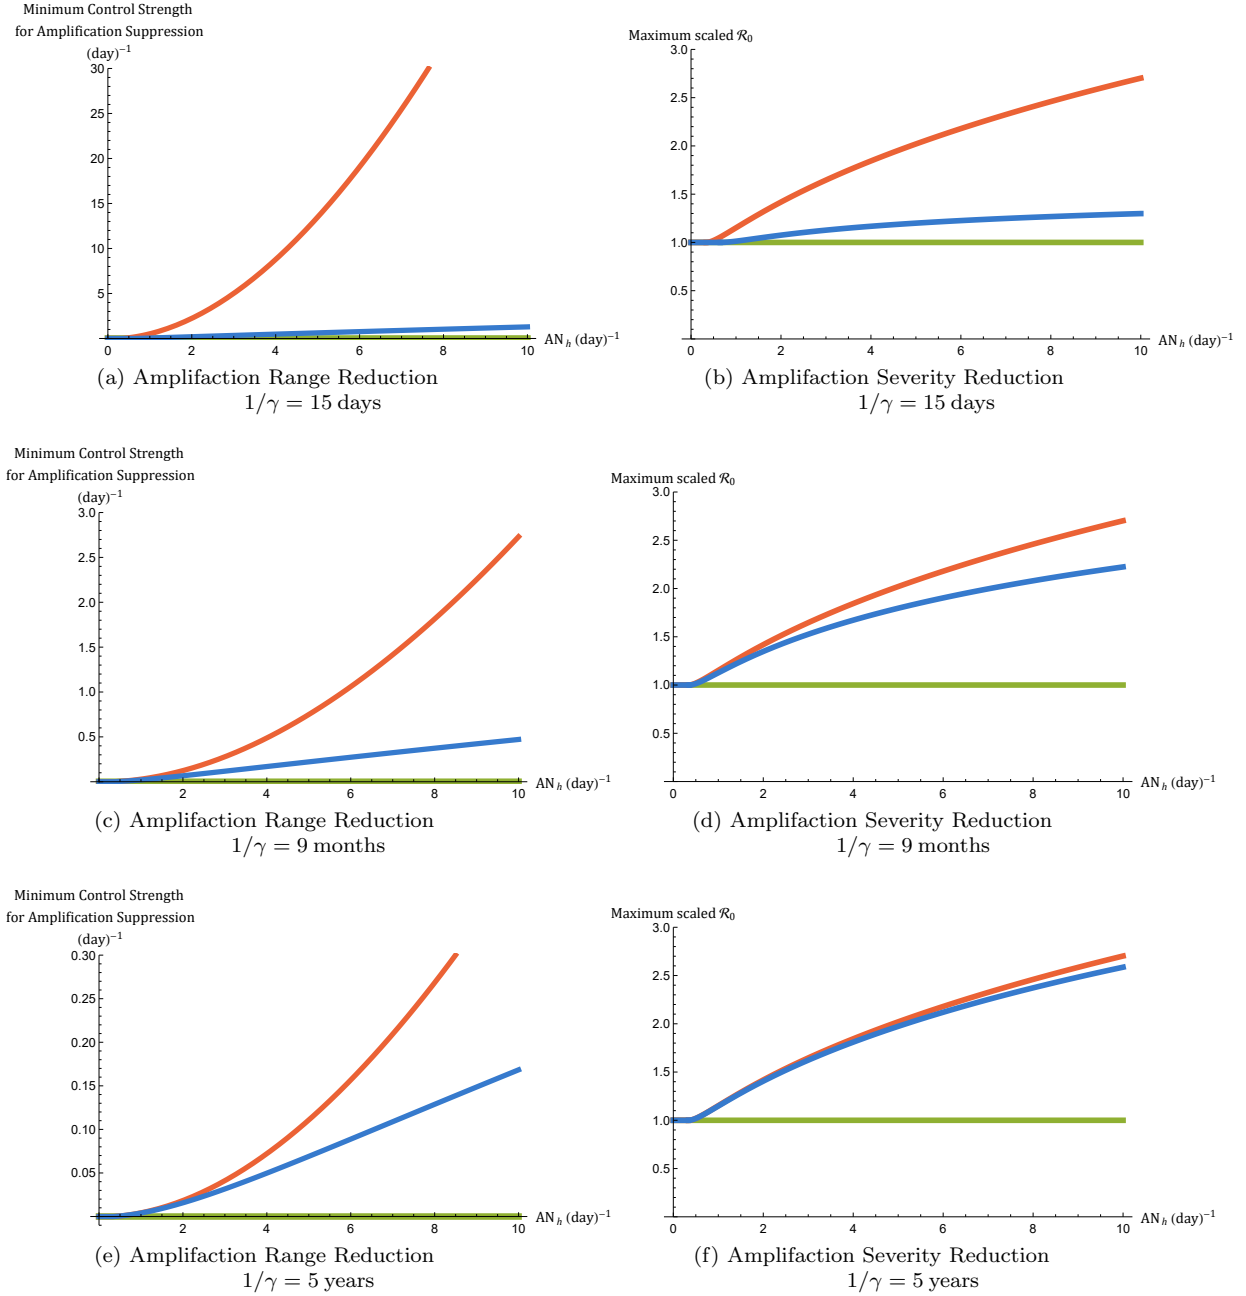

Figure S4: Illustrations of amplification range and strength reduction as functions of  $AN_h$  using the dynamic two-class model (blue), static two-class model (red), and one-class model (green), where the human recovery time  $1/r = 1$  week. The minimum control strength for amplification suppression is the value of control strength  $\kappa^*$  such that scaled  $\mathcal{R}_0$  exceeds unity for all control strengths  $\kappa \in [0, \kappa^*]$ . The maximum scaled  $\mathcal{R}_0$  is the value of scaled  $\mathcal{R}_0$  at the peak of a model's  $\mathcal{R}_0$  vs  $\kappa$  curve for a given value of  $AN_h$ .

## S1.2 Six month recovery time

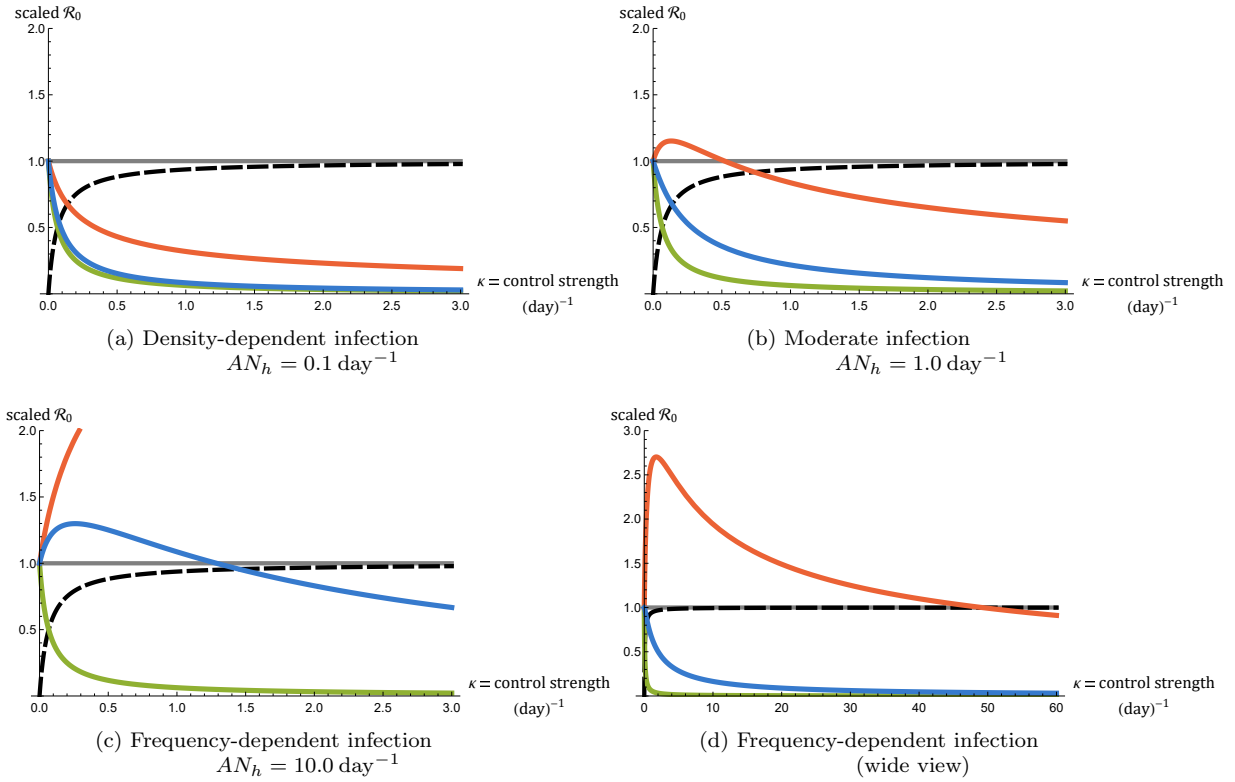

Figure S5: Dependencies of  $\mathcal{R}_0$  on DEET ( $1/\gamma = 15$  days) control strength for the dynamic two-class model (blue), static two-class model (red), and one-class model (green), where the human recovery time  $1/r = 6$  months. Corresponding equilibrium proportions of protected hosts are given by the dashed black curve. Two-host models display diversity amplification at control strengths where respective scaled  $\mathcal{R}_0$  curves rise above the gray  $\mathcal{R}_0 = 1$  line.

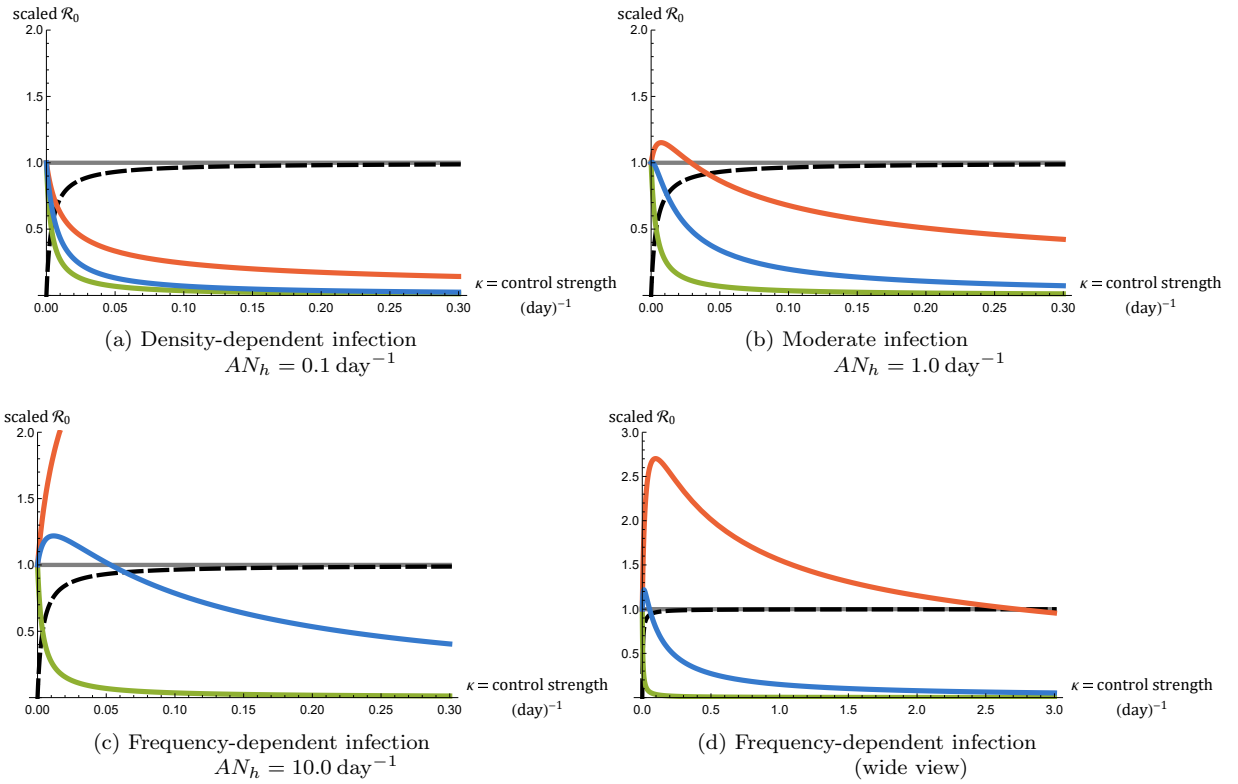

Figure S6: Dependencies of  $\mathcal{R}_0$  on intermediate protection ( $1/\gamma = 9$  months) control strength, where the human recovery time  $1/r = 6$  months. Curve colors and styles are defined as in Fig. S1.

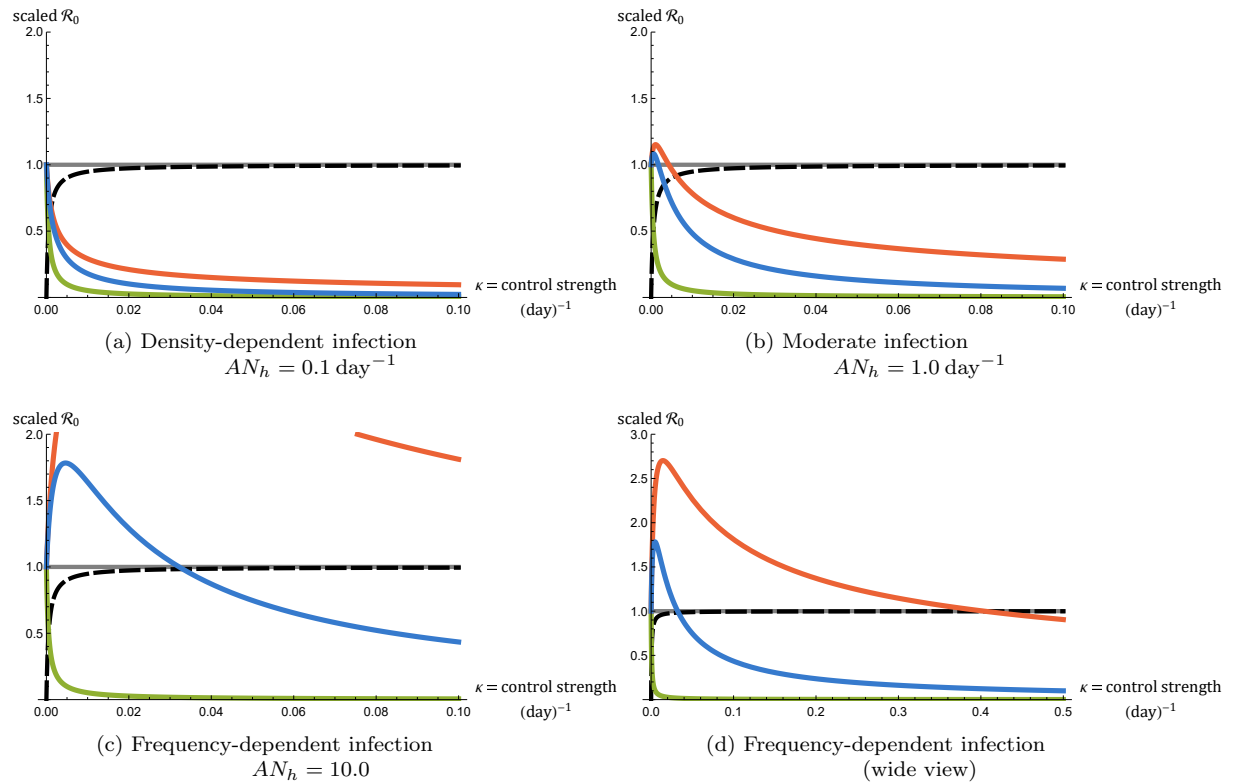

Figure S7: Dependencies of  $\mathcal{R}_0$  on bed net ( $1/\gamma = 5$  years) control strength, where the human recovery time  $1/r = 6$  months. Curve colors and styles are interpreted as in Fig. S1.



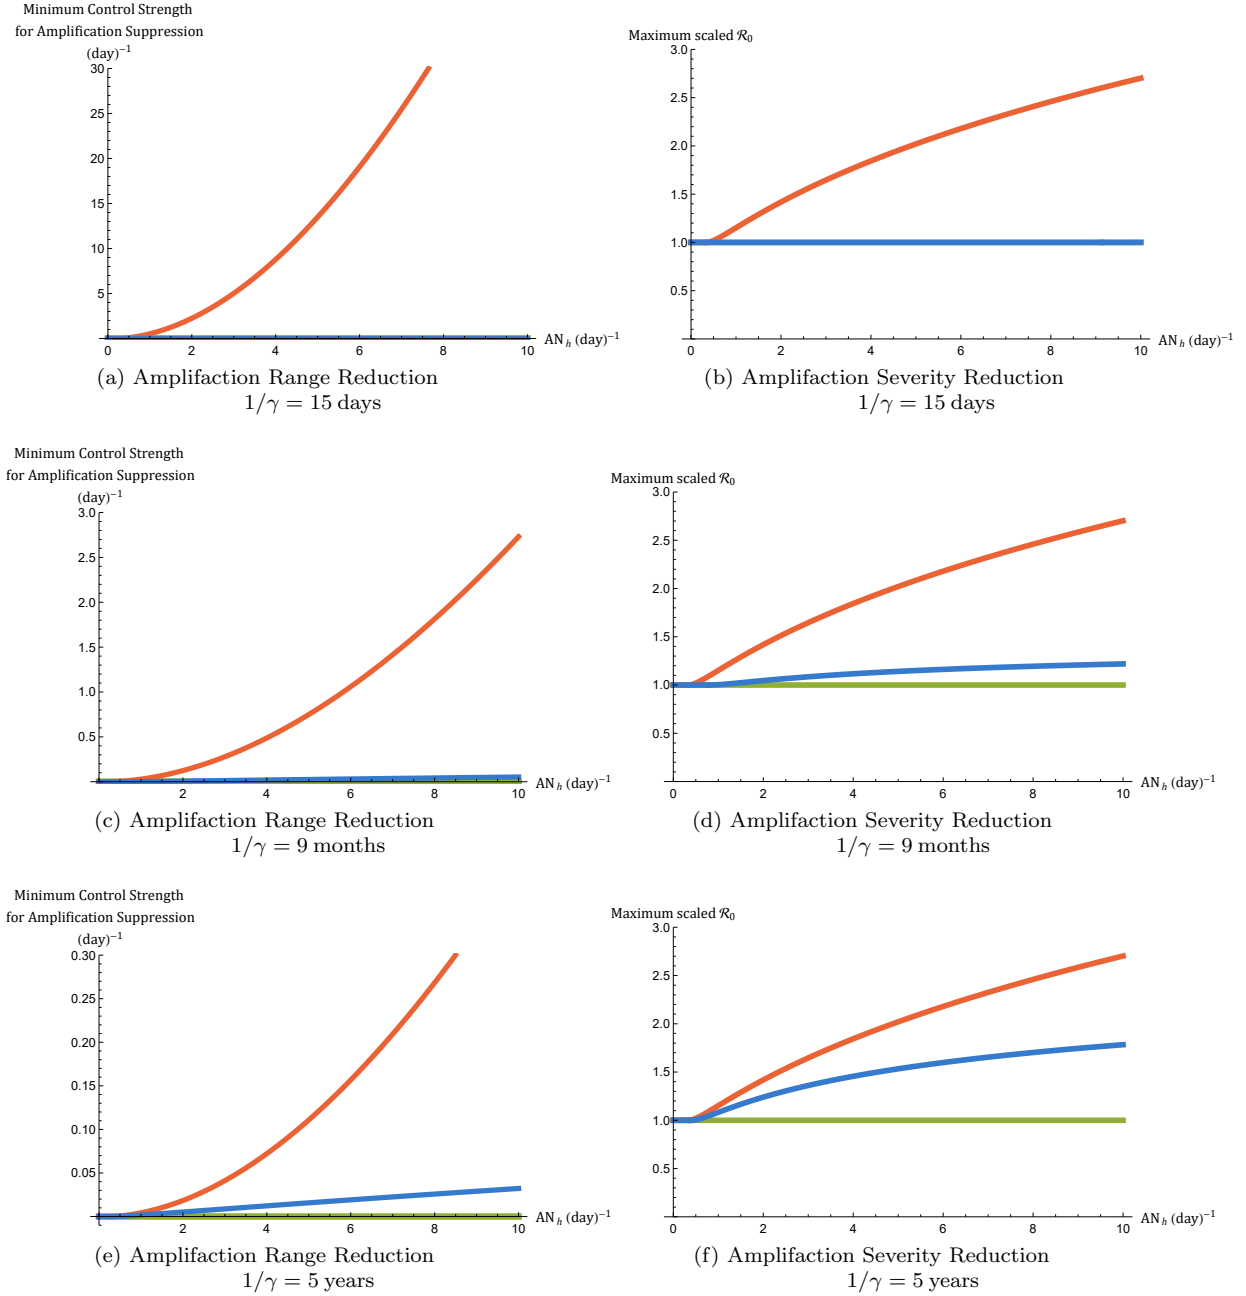

Figure S8: Illustrations of amplification range and strength reduction as functions of  $AN_h$  using the dynamic two-class model (blue), static two-class model (red), and one-class model (green), where the human recovery time  $1/r = 6$  months. The minimum control strength for amplification suppression is the value of control strength  $\kappa^*$  such that scaled  $\mathcal{R}_0$  exceeds unity for all control strengths  $\kappa \in [0, \kappa^*]$ . The maximum scaled  $\mathcal{R}_0$  is the value of scaled  $\mathcal{R}_0$  at the peak of a model's  $\mathcal{R}_0$  vs  $\kappa$  curve for a given value of  $AN_h$ .
